# Supplementary material for: Perturbed maintenance of transcriptional repression on the inactive X-chromosome in the mouse brain after Xist deletion
Source: Springer Nature journal article supplement (doi:10.1186/s13072-018-0219-8), 2018-08-31

# Additional file 3

## RNA seq **X-chromosome** vs. autosomes

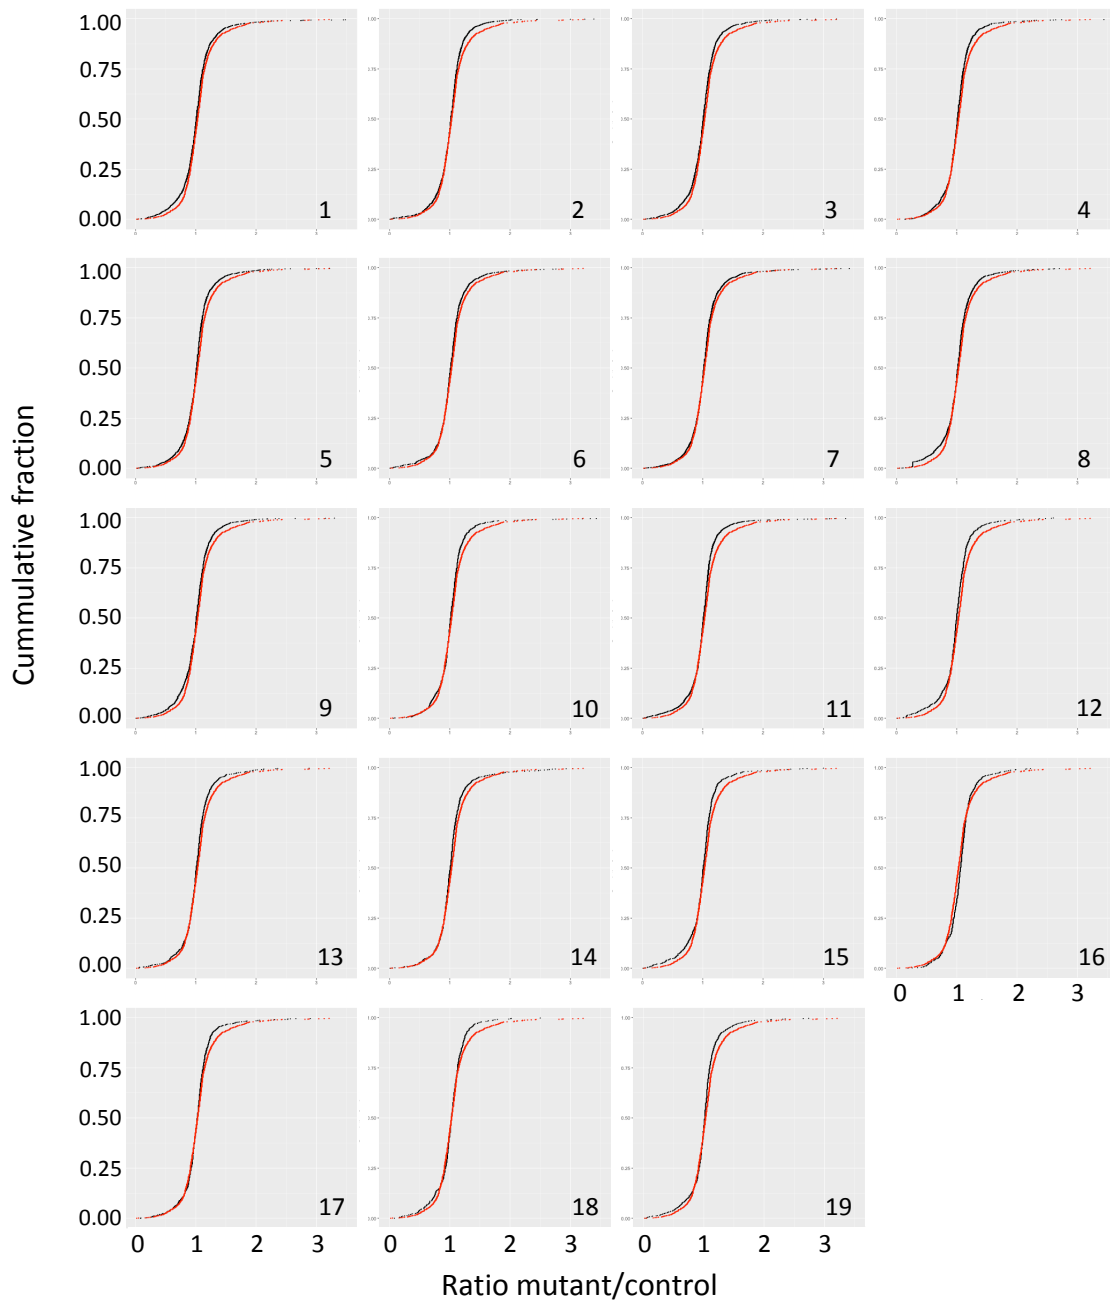

Supplement: 13072_2018_219_MOESM3_ESM.pdf [file 13072_2018_219_MOESM3_ESM.pdf]
