# Supplementary material for: Perturbed maintenance of transcriptional repression on the inactive X-chromosome in the mouse brain after Xist deletion
Source: Springer Nature journal article supplement (doi:10.1186/s13072-018-0219-8), 2018-08-31
Supplement: 13072_2018_219_MOESM5_ESM.pdf [file 13072_2018_219_MOESM5_ESM.pdf]

## Additional file 5

Table 1

Primers:

Xist2lox excision

F: 5'-CACTGGCAAGGTGAATAGCA-3'

R1: 5'TTTCTGGTCTTTGAGGGCAC-3'

R1 5'-ACCCTTGCCTTTTCCATTTT-3'

MeCP2-EGFP genotyping:

F: 5'-GCACCATCTTCTTCAAGGAC-3'

R: 5'-CCTTGATGCCGTTCTTCTG-3'

Nestin-Cre genotyping:

F: 5'-GTATGACGTCCCTTGCCATT-3'

R: 5'-ATGTCCATCAGGTTCTTGCG-3'

EGFP RT-qPCR:

F: 5'-ACCCTGAAGTTCATCTGCAC-3'

R: 5'-GGTCTTGTAGTTGCCGTCG-3'

GAPDH RT-qPCR

F: 5'-GCCCATCACCATCTTCCAG-3'

R: 5'-TTTGGCTCCACCCTTCAAG-3'
